# Supplementary material for: Waterborne polyurethane conjugated with novel diol chain-extender bearing cyclic phosphoramidate lateral group: synthesis, flammability and thermal degradation mechanism
Source: Royal Society of Chemistry journal article supplement (doi:10.1039/c6ra06856a), 2016-01-01
Supplement: c6ra06856a1.pdf [file c6ra06856a1.pdf]

Electronic Supplementary Material (ESI) for RSC Advances.  
This journal is © The Royal Society of Chemistry 2016

---

**Waterborne polyurethane conjugated with novel diol chain-extender bearing cyclic phosphoramidate lateral group: synthesis, flammability and thermal degradation mechanism**

Peikun Zhang,<sup>a</sup> Zhenyu Zhang,<sup>a</sup> Haojun Fan,<sup>\*a</sup> Saiqi Tian,<sup>a</sup> Yi Chen<sup>b</sup> and Jun Yan<sup>b</sup>

<sup>a</sup> Key Laboratory of Leather Chemistry and Engineering (Sichuan University), Ministry of Education, Chengdu  
610065, P. R. China

<sup>b</sup> National Engineering Laboratory for Clean Technology of Leather Manufacture, Sichuan University, Chengdu  
610065, P. R. China

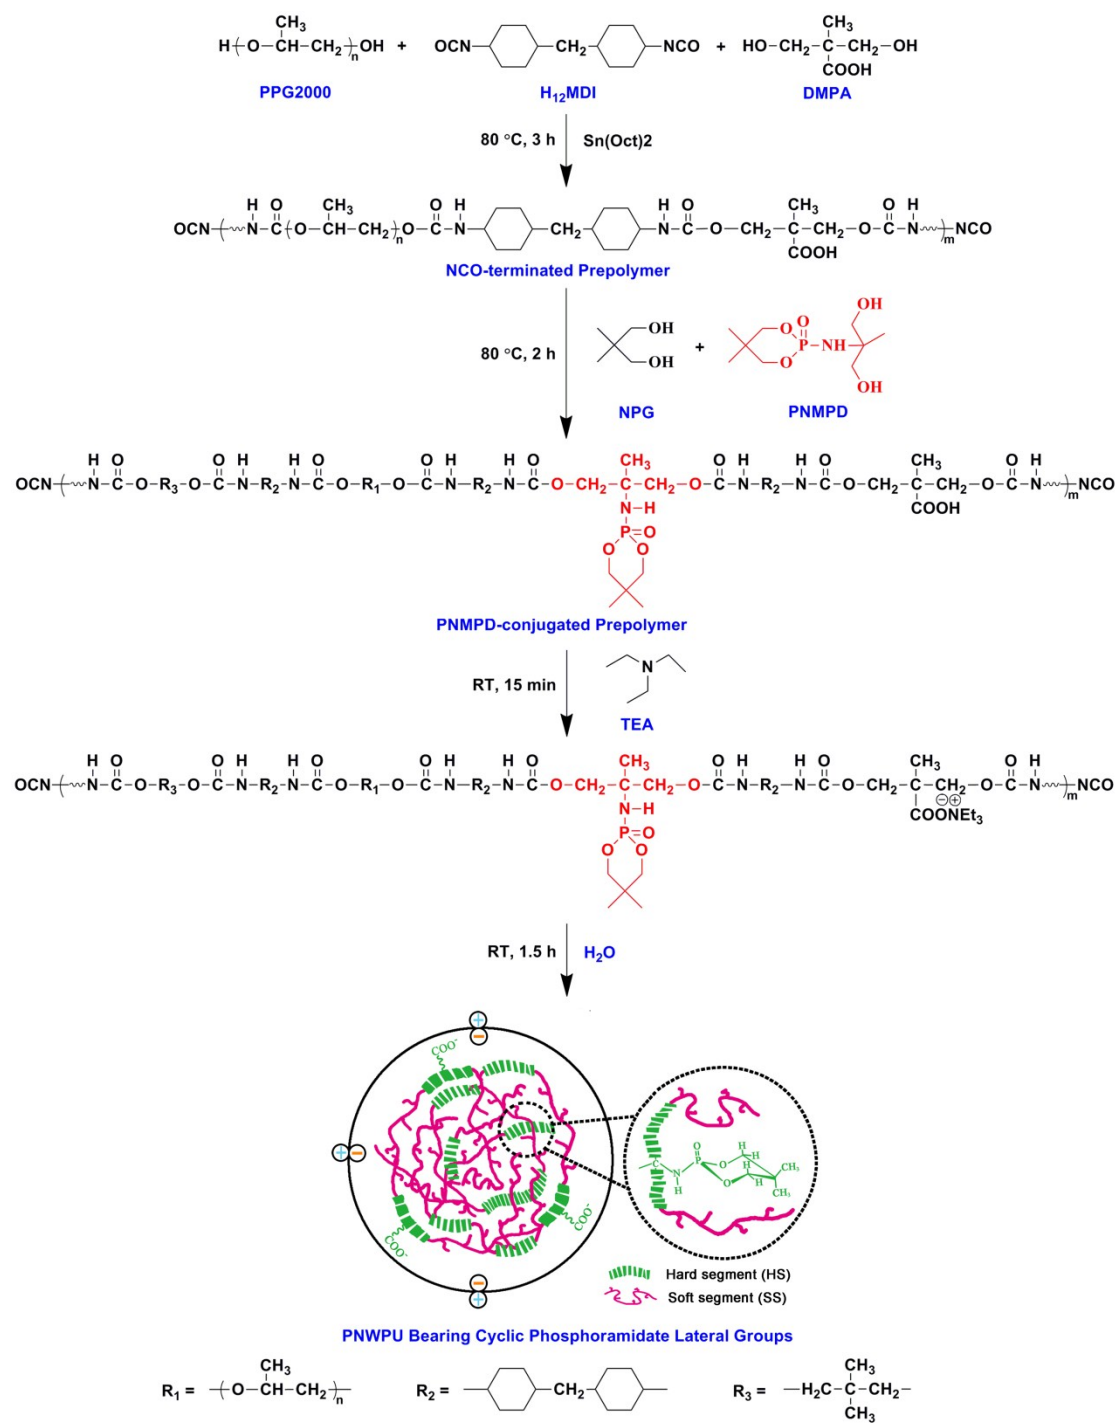

Fig.S1 Flowchart of the reaction process of PNWPU dispersions.

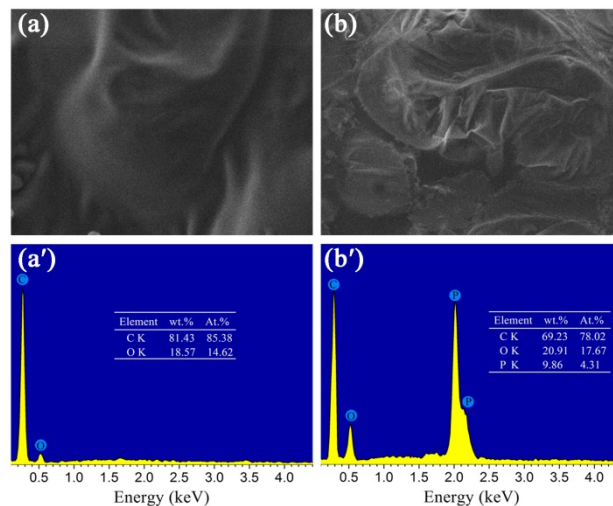

Fig.S2 EDX spectra of WPU (a) and PNWPU-12 (b) char residue after CC test.

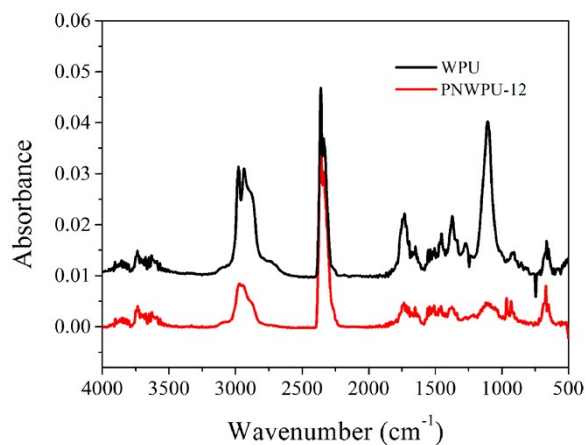

Fig.S3 FTIR spectra of pyrolysis gaseous products of WPU and PNWPU-12 at maximum degradation rate.

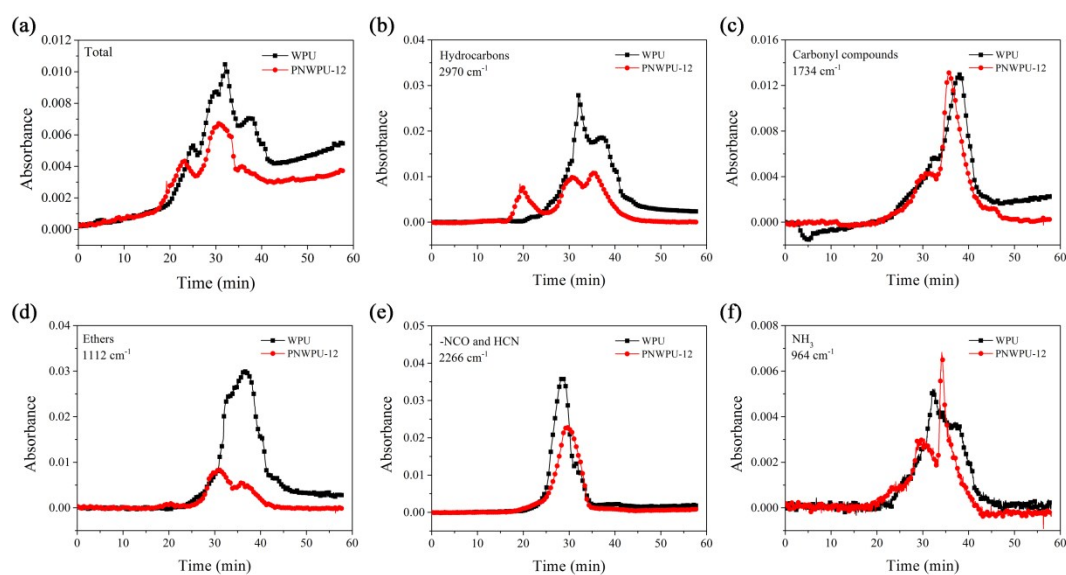

Fig.S4 Absorbance of selected pyrolysis products vs. time for WPU and PNWPU-12.

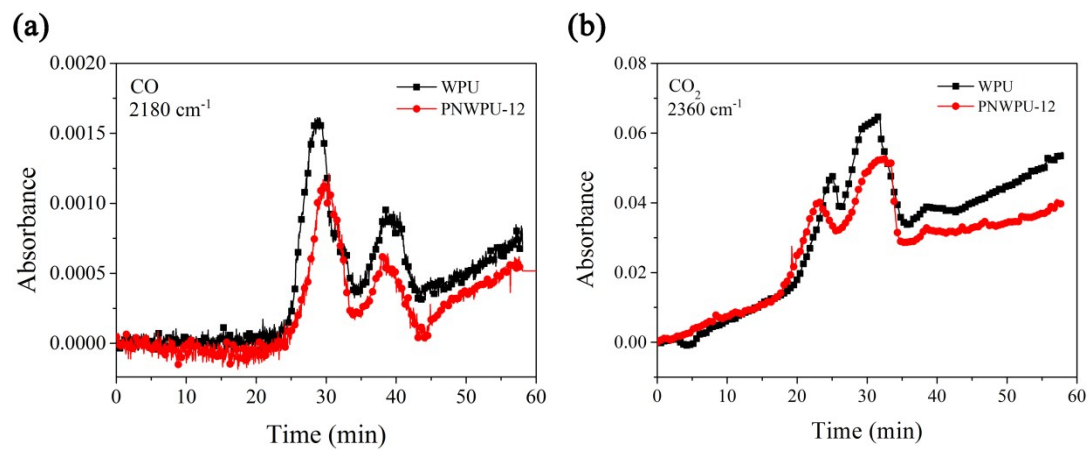

Fig.S5 Absorbance of CO (a) and CO<sub>2</sub> (b) vs. time for WPU and PNWPU-12.
